# Supplementary material for: Gastrointestinal endoscope contamination rates – elevators are not only to blame: a systematic review and meta-analysis
Source: PubMed Central journal article supplement — Endosc Int Open. 2022 Jun 10;10(6):E840–53. doi: 10.1055/a-1795-8883 (PMC9187382; doi:10.1055/a-1795-8883), 2022-06-10
Supplement: 2390supmat_10-1055-a-1795-8883.pdf [file 2390supmat_10-1055-a-1795-8883.pdf]

## Supplementary material

## Supplementary Material

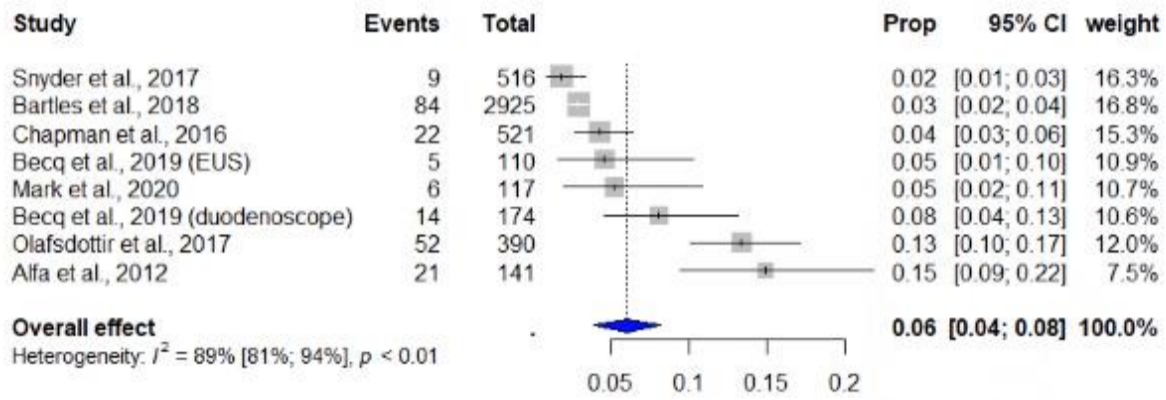

**Supplementary Fig. 1** Pooled estimates of contamination rates beyond the elevator for studies conducted in North America. CI, confidence interval; EUS, endoscopic ultrasound.

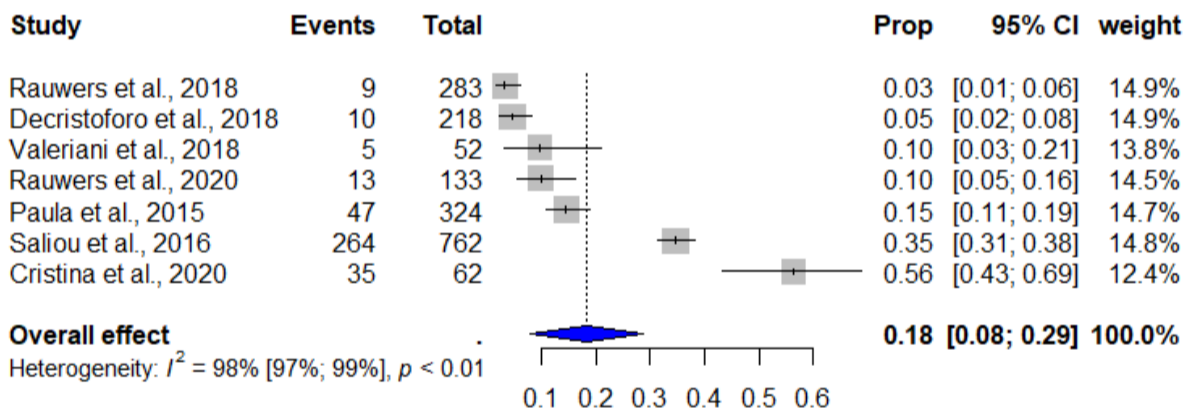

**Supplementary Fig. 2** Pooled estimates of contamination rates beyond the elevator for studies conducted in Europe. CI, confidence interval.

## Supplementary material

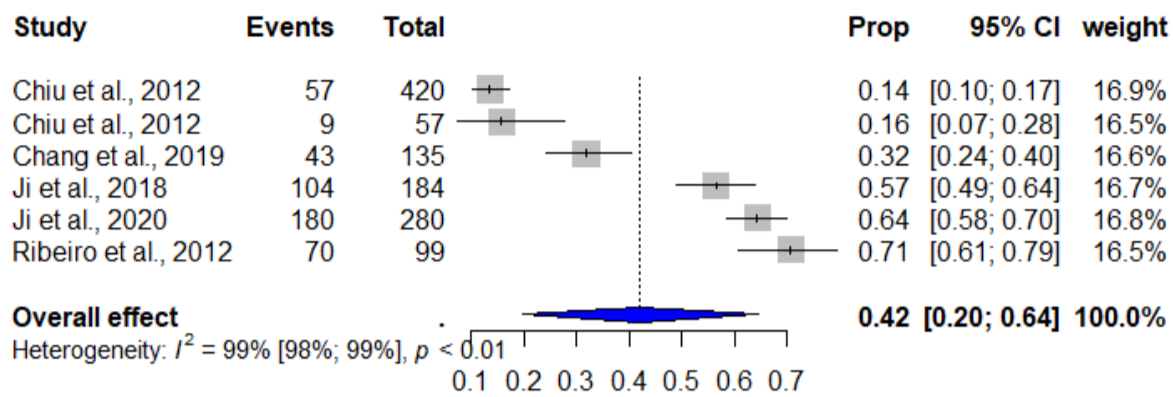

**Supplementary Fig. 3** Pooled estimates of contamination rates beyond the elevator for studies conducted in the rest of the world. CI, confidence interval.

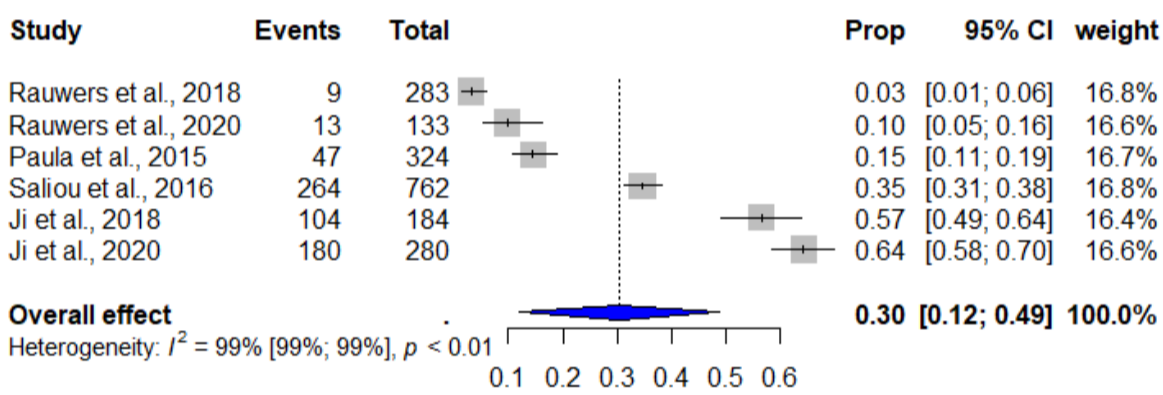

**Supplementary Fig. 4** Pooled estimates of contamination rates beyond the elevator for studies using CFU threshold  $\geq 20$ . CI, confidence interval.

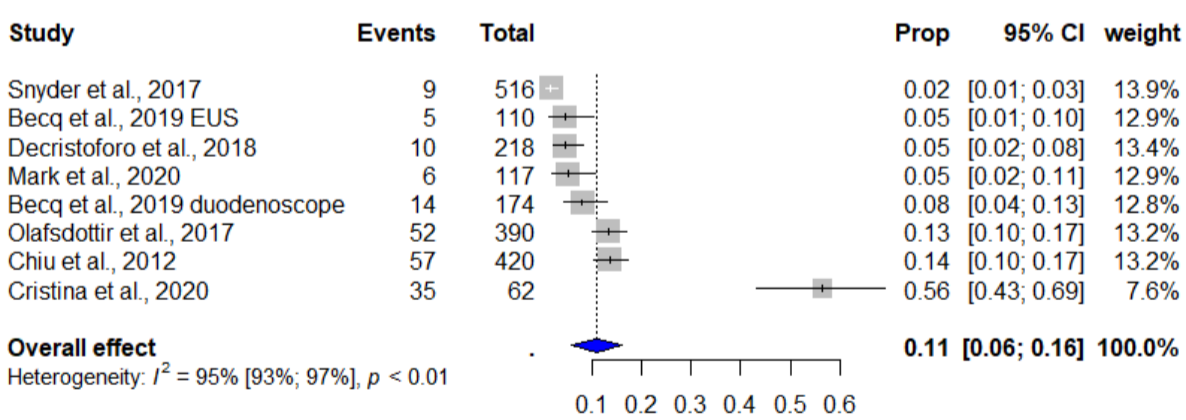

**Supplementary Fig. 5** Pooled estimates of contamination rates beyond the elevator for studies using CFU threshold  $< 20$ . CI, confidence interval.
